# Supplementary material
Source: Research Square preprint supplement (doi:10.21203/rs.3.rs-9374564/v1)
Supplement: Supplementary file 1 [file 07a2cd3379992b145c1f4850.docx]

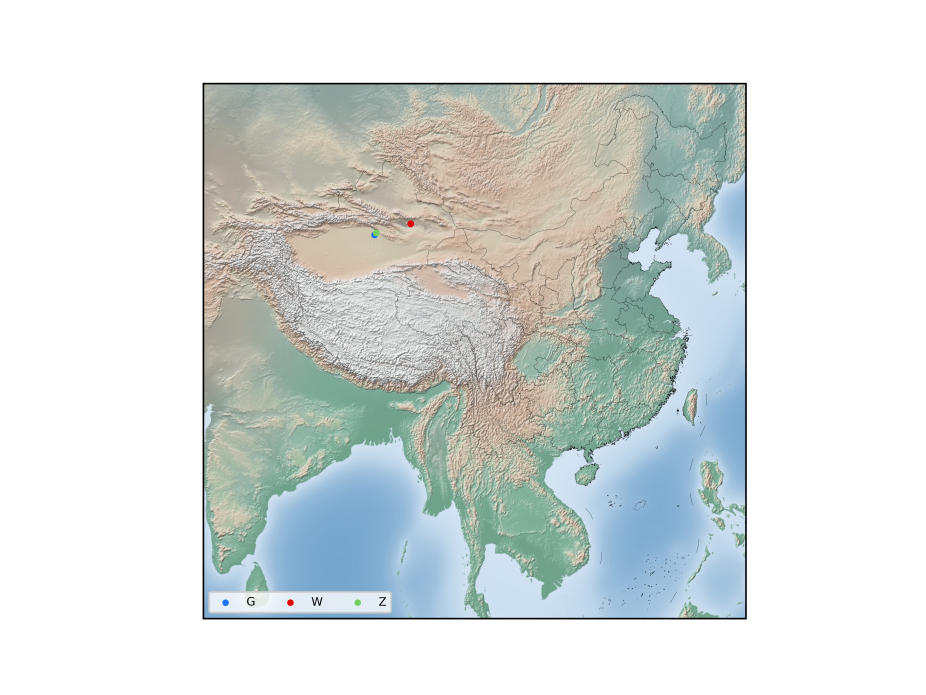


**Fig. S1 Geographical Distribution Map of 45 Samples.** (G: *Glycyrrhiza* *glabra*, W: *Glycyrrhiza uralensis*, Z: *Glycyrrhiza inflata*)


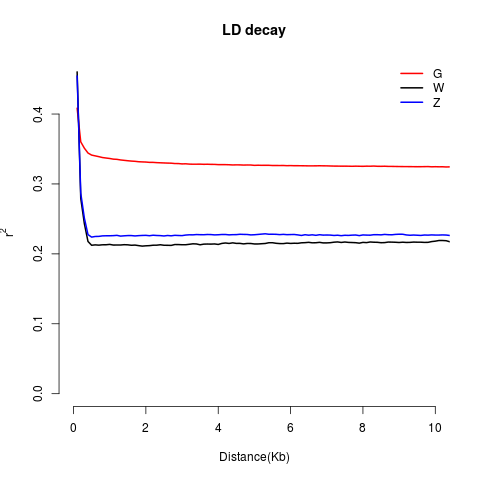


**Fig. S2 Linkage disequilibrium (LD) analysis for three licorice populations;** x-axis: distance, y-axis: LD coefficient.


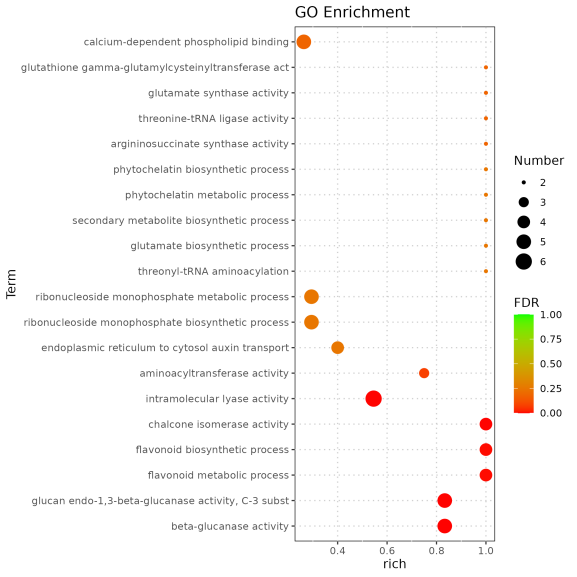

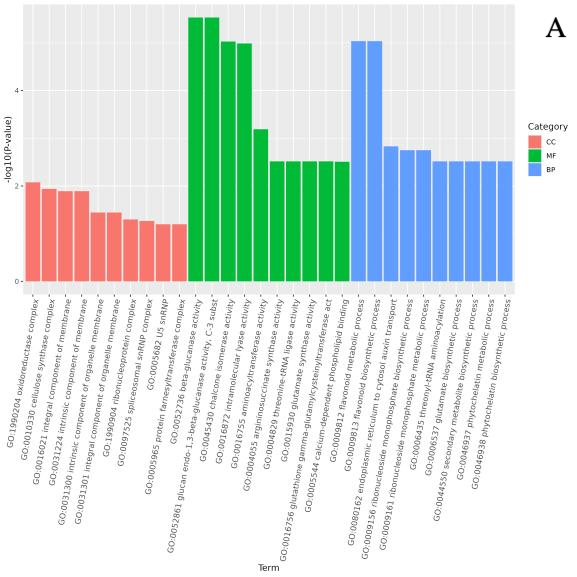


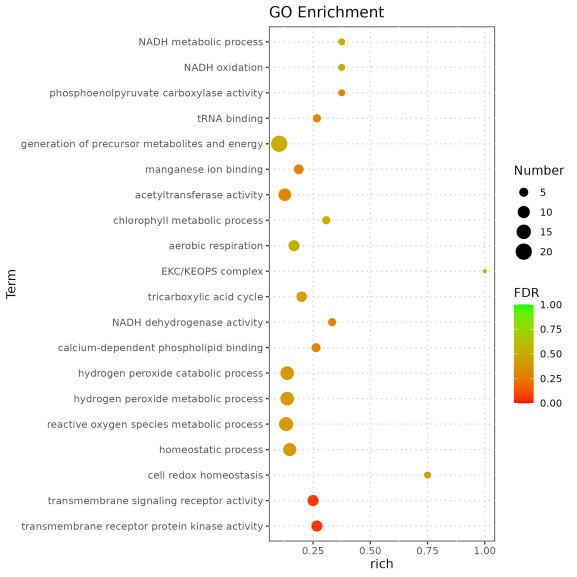

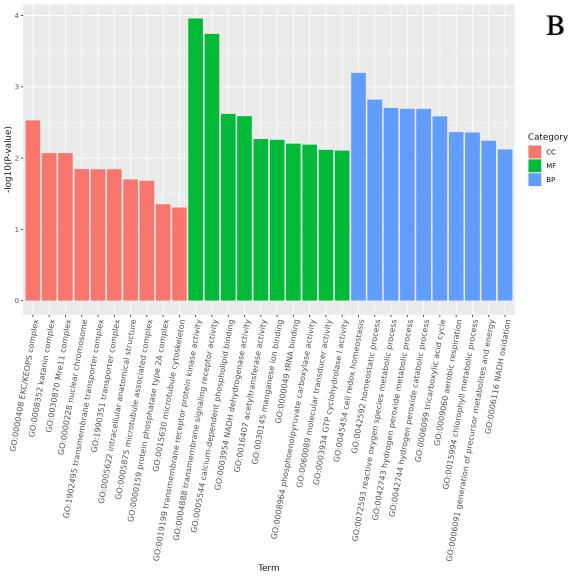


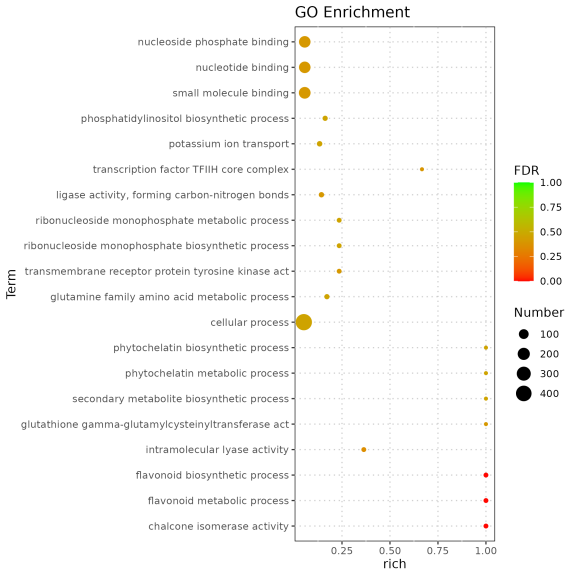

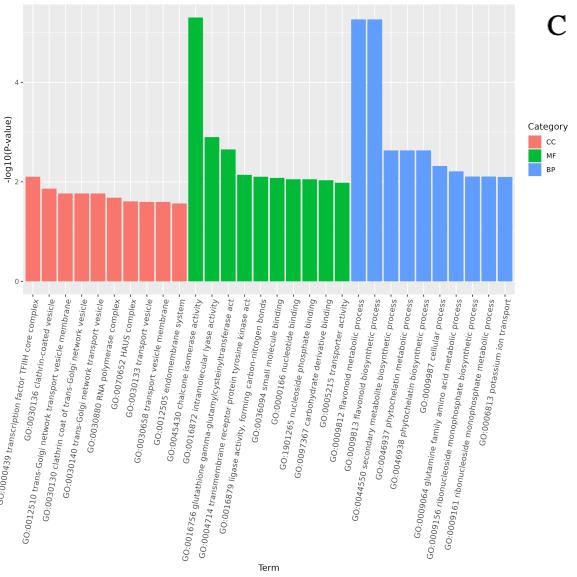


**Fig. S3 Functional enrichment analysis based on Gene Ontology (GO).** Bubble plots (left) show significantly enriched GO terms: Y-axis: GO term name; X-axis: Enrichment factor; Bubble color: FDR value; Bubble size: Number of genes. A)*G. glabra* vs *G. uralensis* (G-vs-W). B)*G. glabra* vs *G. inflata* (G-vs-Z). C)*G. uralensis* vs *G. inflata* (W-vs-Z).


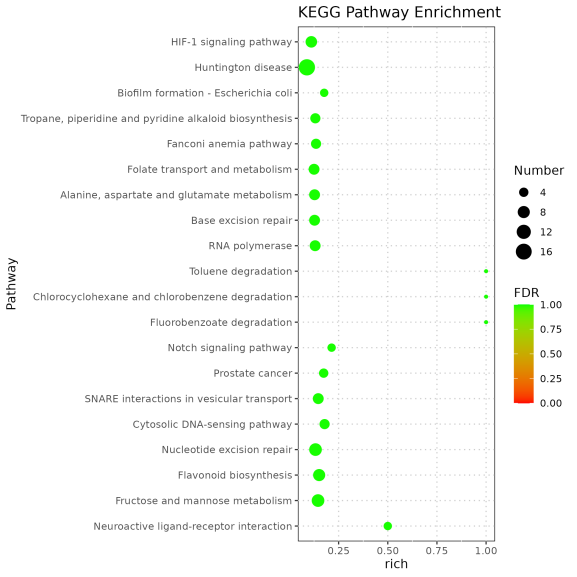

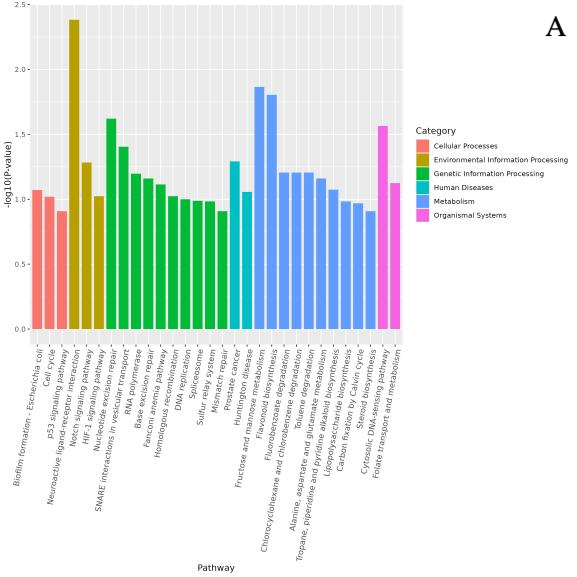


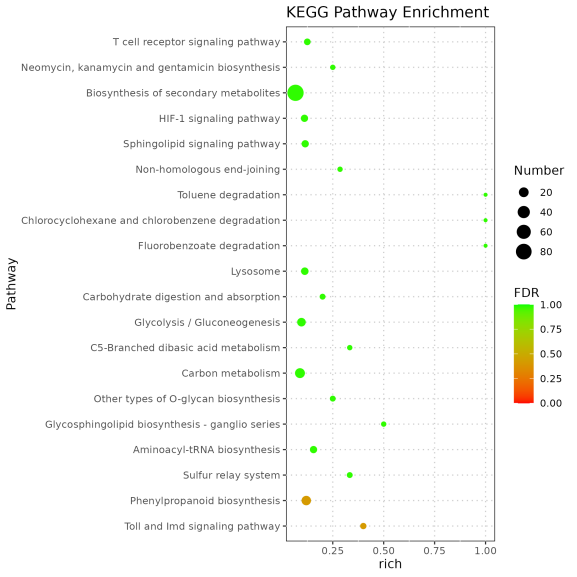

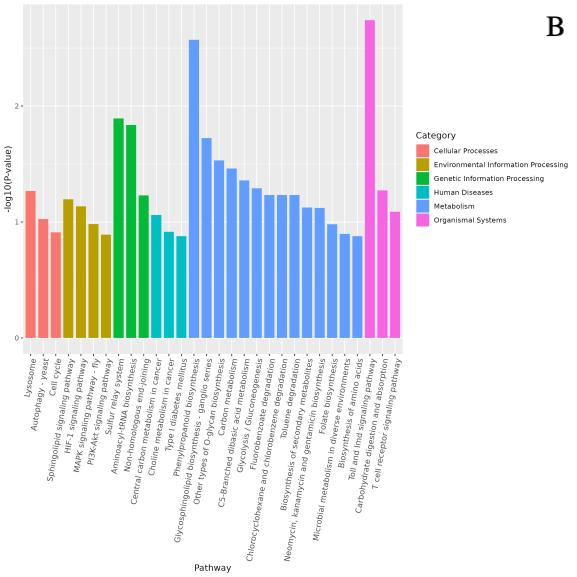


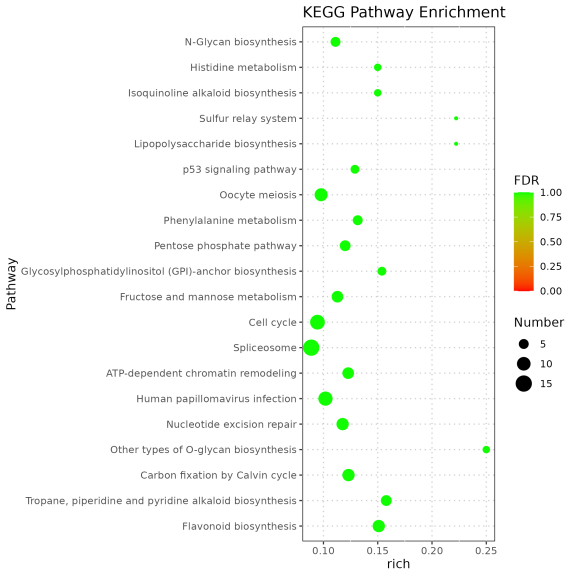

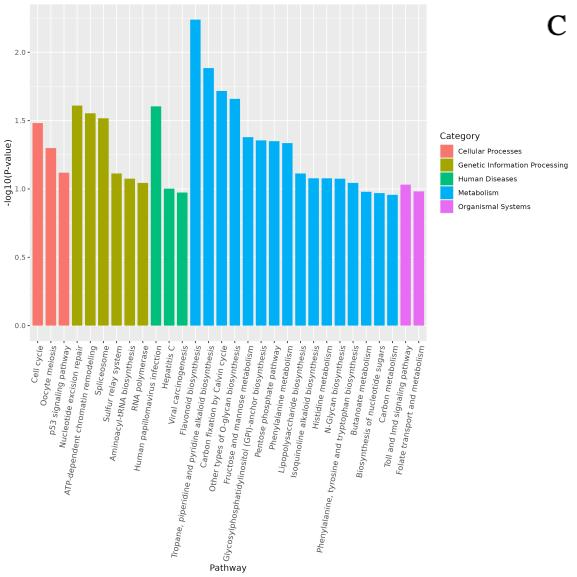


**Fig. S4 Functional enrichment analysis based on Kyoto Encyclopedia of Genes and Genomes (KEGG).** Bar chart Y-axis: -log10(P-value) (higher values indicate more significant pathway enrichment); X-axis: KEGG pathway names. Bubble chart elements: Bubble size represents gene count; color reflects enrichment significance. A)*G. glabra* vs *G. uralensis* (G-vs-W). B)*G. glabra* vs *G. inflata* (G-vs-Z). C)*G. uralensis* vs *G. inflata* (W-vs-Z).
